# Supplementary material for: Genetic and Epigenetic Stability in Rye Seeds under Different Storage Conditions: Ageing and Oxygen Effect
Source: PubMed Central journal article supplement (PMC7154831; doi:10.3390/plants9030393), 2020-03-23
Supplement: plants-09-00393-s001.pdf [file plants-09-00393-s001.pdf]

## Supplementary material: Statistical analyses

**Table S1.** Likelihood-ratio test (G2) results of the percentages of methylation status changes (Figure 3) determined by MSAP markers in stored and stored-imbibed seeds of *Secale cereale*. Seeds were stored at 35 °C, 15% wc under two different storage atmospheres (air or vacuum) and times (13, 29 or 36 days).

| Factors              | Df | Stored Seeds |         | Stored-Imbibed Seeds |         |
|----------------------|----|--------------|---------|----------------------|---------|
|                      |    | G2           | P-value | G2                   | P-value |
| Storage time         | 4  | 13.20        | 0.01    | 19.29                | <0.001  |
| Atmosphere           | 2  | 1.22         | 0.54    | 1.35                 | 0.51    |
| S. time x Atmosphere | 4  | 14.04        | 0.01    | 15.41                | <0.001  |

**Table S2.** Likelihood-ratio test (G2) results of the percentages of methylation status changes (Figure 3) determined by MSAP markers in stored seeds of *Secale cereale*: pair-wise comparison between storage atmosphere (air or vacuum), for each storage time.

| Storage Time  | Factor: Atmosphere |              |         |                      |         |
|---------------|--------------------|--------------|---------|----------------------|---------|
|               | Df                 | Stored Seeds |         | Stored-Imbibed Seeds |         |
|               |                    | G2           | P-value | G2                   | P-value |
| 13 days (P75) | 2                  | 2.54         | 0.28    | 5.34                 | 0.07    |
| 29 days (P20) | 2                  | 0.80         | 0.67    | 3.09                 | 0.21    |
| 36 days (P0)  | 2                  | 11.93        | < 0.001 | 8.33                 | 0.02    |

**Table S3.** Likelihood-ratio test (G2) results of the percentages of methylation status changes (Figure 3a) determined by MSAP markers in stored seeds of *Secale cereale*: pair-wise comparison between storage times.

| Pair-wise comparison      | Df | Air  |         | Vacuum |         |
|---------------------------|----|------|---------|--------|---------|
|                           |    | G2   | P-value | G2     | P-value |
| <b>13 days vs 29 days</b> | 2  | 4.69 | 0.1     | 0.07   | 0.97    |
| 13 days vs 36 days        | 2  | 6.43 | 0.04    | 11.48  | < 0.001 |
| 29 days vs 36 days        | 2  | 8.31 | 0.02    | 11.29  | < 0.001 |

**Table S4.** Likelihood-ratio test (G2) results of the percentages of methylation status changes (Figure 3b) determined by MSAP markers in stored-imbibed seeds of *Secale cereale*: pair-wise comparison between storage times.

| Pair-Wise Comparison | Df | Air  |         | Vacuum |         |
|----------------------|----|------|---------|--------|---------|
|                      |    | G2   | P-value | G2     | P-value |
| 13 days vs 29 days   | 2  | 4.65 | 0.10    | 3.66   | 0.16    |
| 13 days vs 36 days   | 2  | 8.93 | 0.01    | 20.10  | < 0.001 |
| 29 days vs 36 days   | 2  | 6.25 | 0.04    | 10.19  | 0.01    |

**Table S5.** Likelihood-ratio test (G2) results of the percentages of methylation status changes (Figure. 4) determined by MSAP markers in seedlings of *Secale cereale* produced from seeds stored at 35 °C, 15% wc with different storage atmospheres (air or vacuum) and times (13 and 29 days).

| <b>Factors</b>       | <b>Df</b> | <b>G2</b> | <b>P-value</b> |
|----------------------|-----------|-----------|----------------|
| Storage time         | 2         | 20.31     | < 0.001        |
| Atmosphere           | 2         | 4.15      | 0.13           |
| S. time x Atmosphere | 2         | 3.64      | 0.16           |
